# Supplementary material for: Growing sensitivity of maize to water scarcity under climate change
Source: PubMed Central journal article supplement (PMC4726359; doi:10.1038/srep19605), 2016-01-25
Supplement: srep19605-s1.pdf [file srep19605-s1.pdf]

## **Supplementary information**

### **Growing sensitivity of maize to water scarcity under climate change**

**Qingfeng Meng<sup>1,2,3</sup>, Xinping Chen<sup>1</sup>, David B. Lobell<sup>2</sup>, Zhenling Cui<sup>1</sup>, Yi Zhang<sup>4</sup>, Haishun Yang<sup>5</sup> & Fusuo Zhang<sup>1</sup>**

<sup>1</sup> China Agricultural University, Beijing 100193, China.

<sup>2</sup> Department of Environmental Earth System Science and Center on Food Security and the Environment, Stanford University, California 94305, USA.

<sup>3</sup> Institute of Crop Science, Chinese Academy of Agricultural Sciences and the Key Laboratory of Crop Physiology and Ecology, Ministry of Agriculture, Beijing 100081, China.

<sup>4</sup> Chinese Academy of Meteorological Sciences, Beijing 100081, China.

<sup>5</sup> Department of Agronomy and Horticulture, University of Nebraska-Lincoln, NE 68583, USA.

Correspondence and requests for materials should be addressed to X.C.

(email: chenxp@cau.edu.cn)

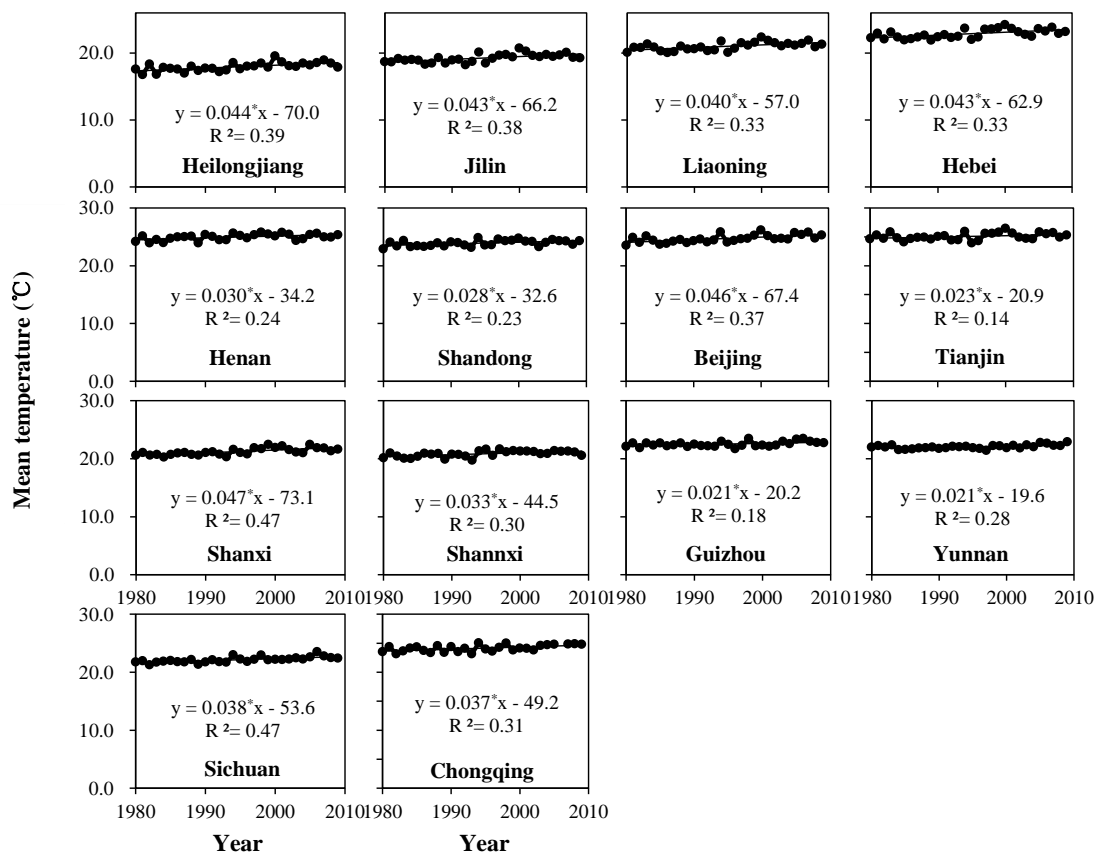

**Supplementary Figure S1. The mean temperature change from 1980 to 2009 for each province in Chinese Maize Belt. \* $P < 0.05$ .**

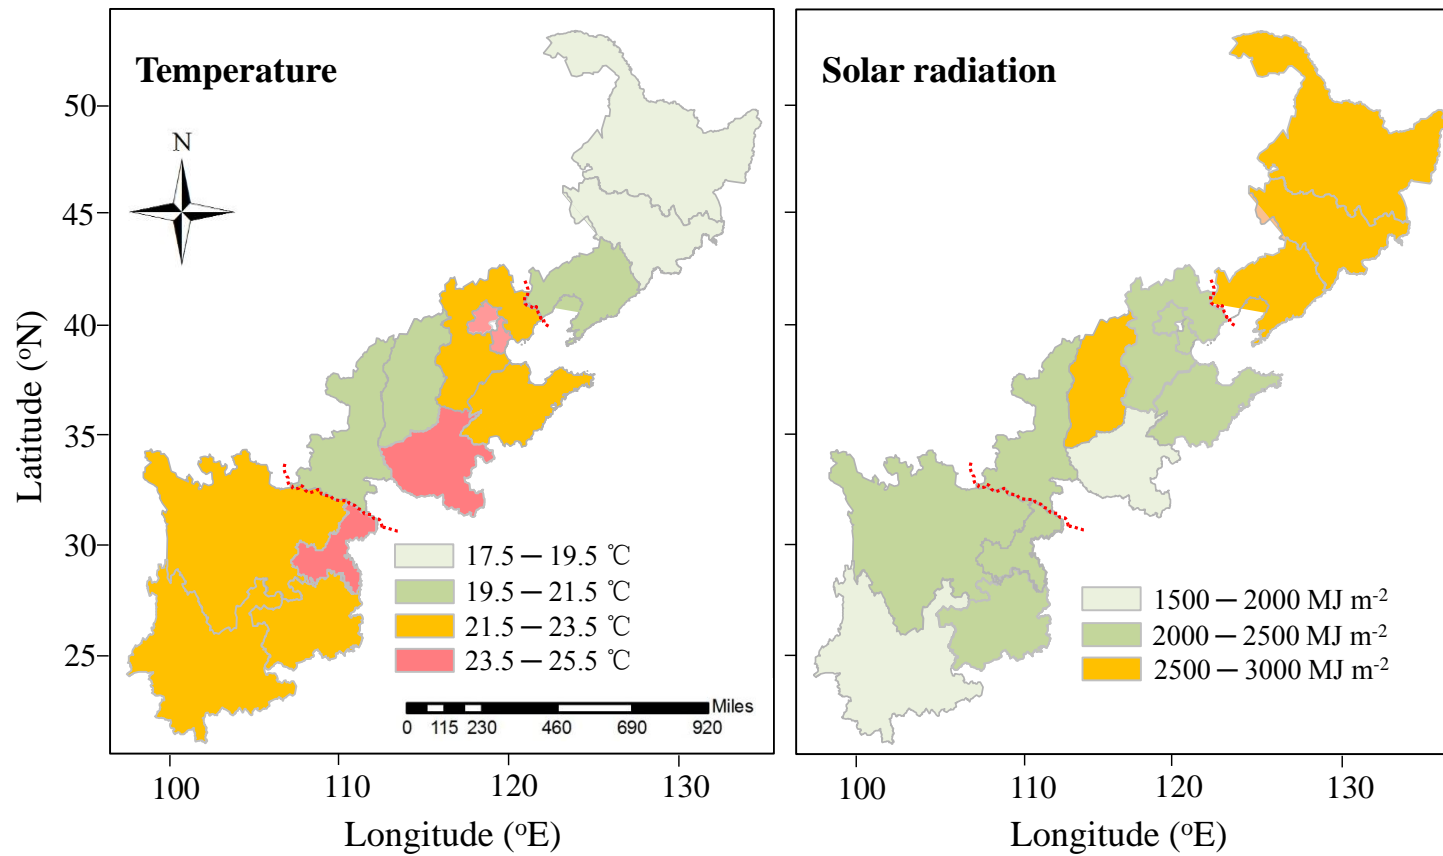

**Supplementary Figure S2. The baseline temperature and solar radiation in 1980s (1980-1989) in Chinese Maize Belt.** We firstly made the standard module with ArcGIS 10.0 for the province level and then copied to the PowerPoint 2010. Then we made the individual map. Secondly, the maps were generated in PowerPoint 2010.

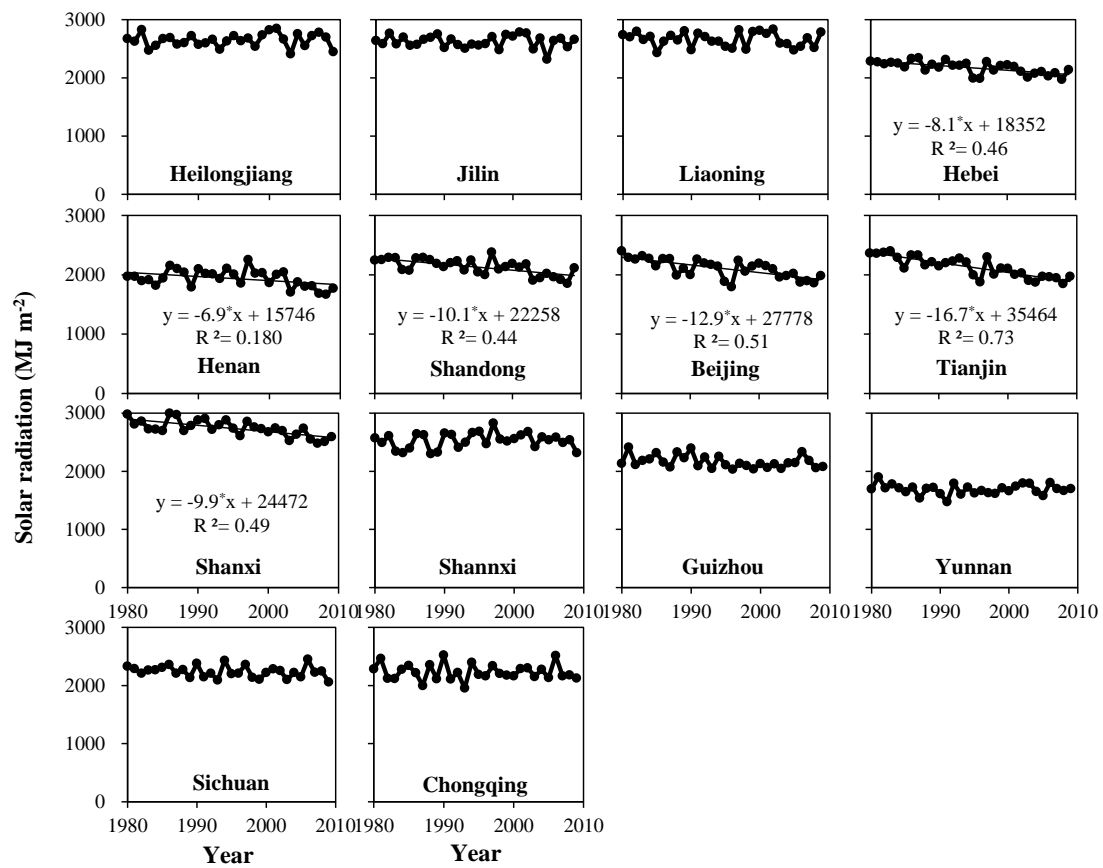

**Supplementary Figure S3. The solar radiation change from 1980 to 2009 for each province in Chinese Maize Belt. \* $P < 0.05$ .**

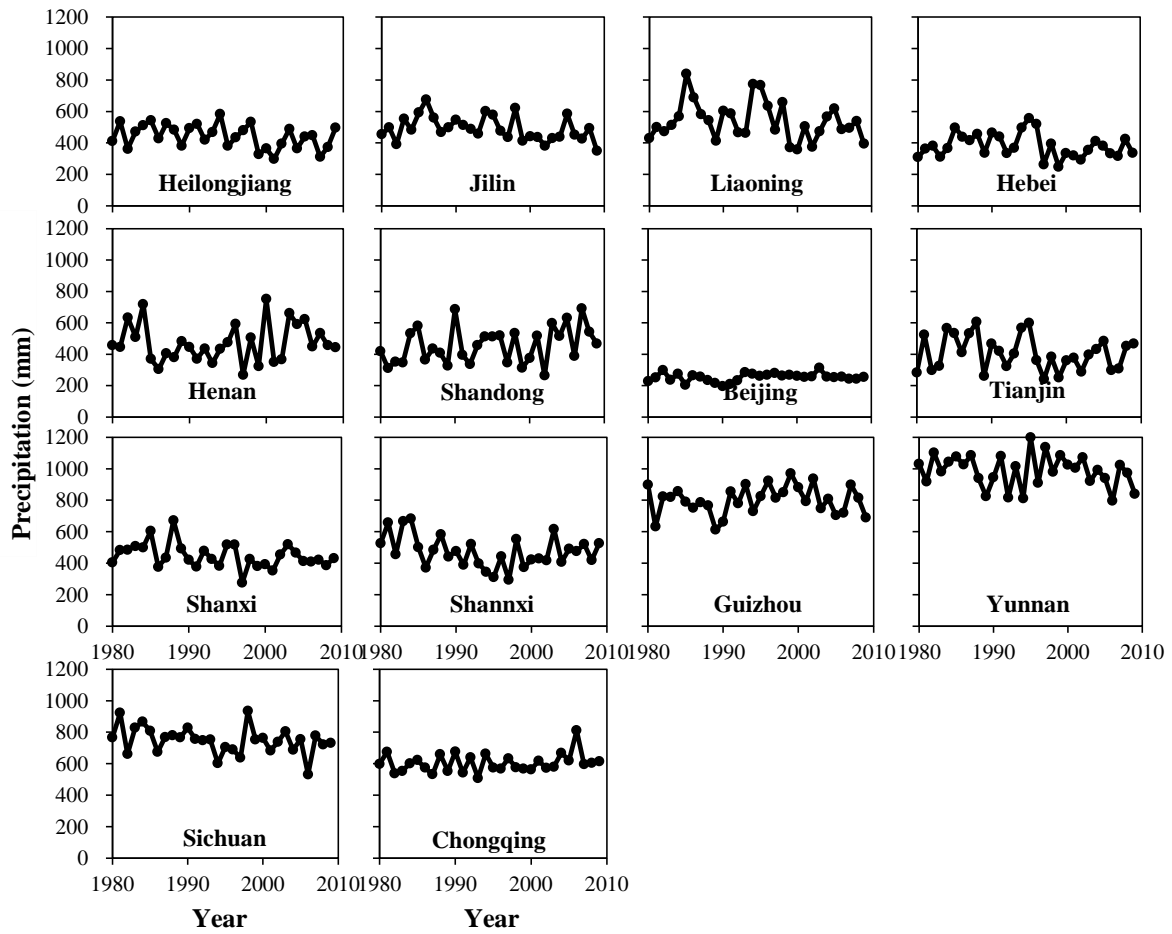

**Supplementary Figure S4. The precipitation change from 1980 to 2009 for each province in Chinese Maize Belt.**

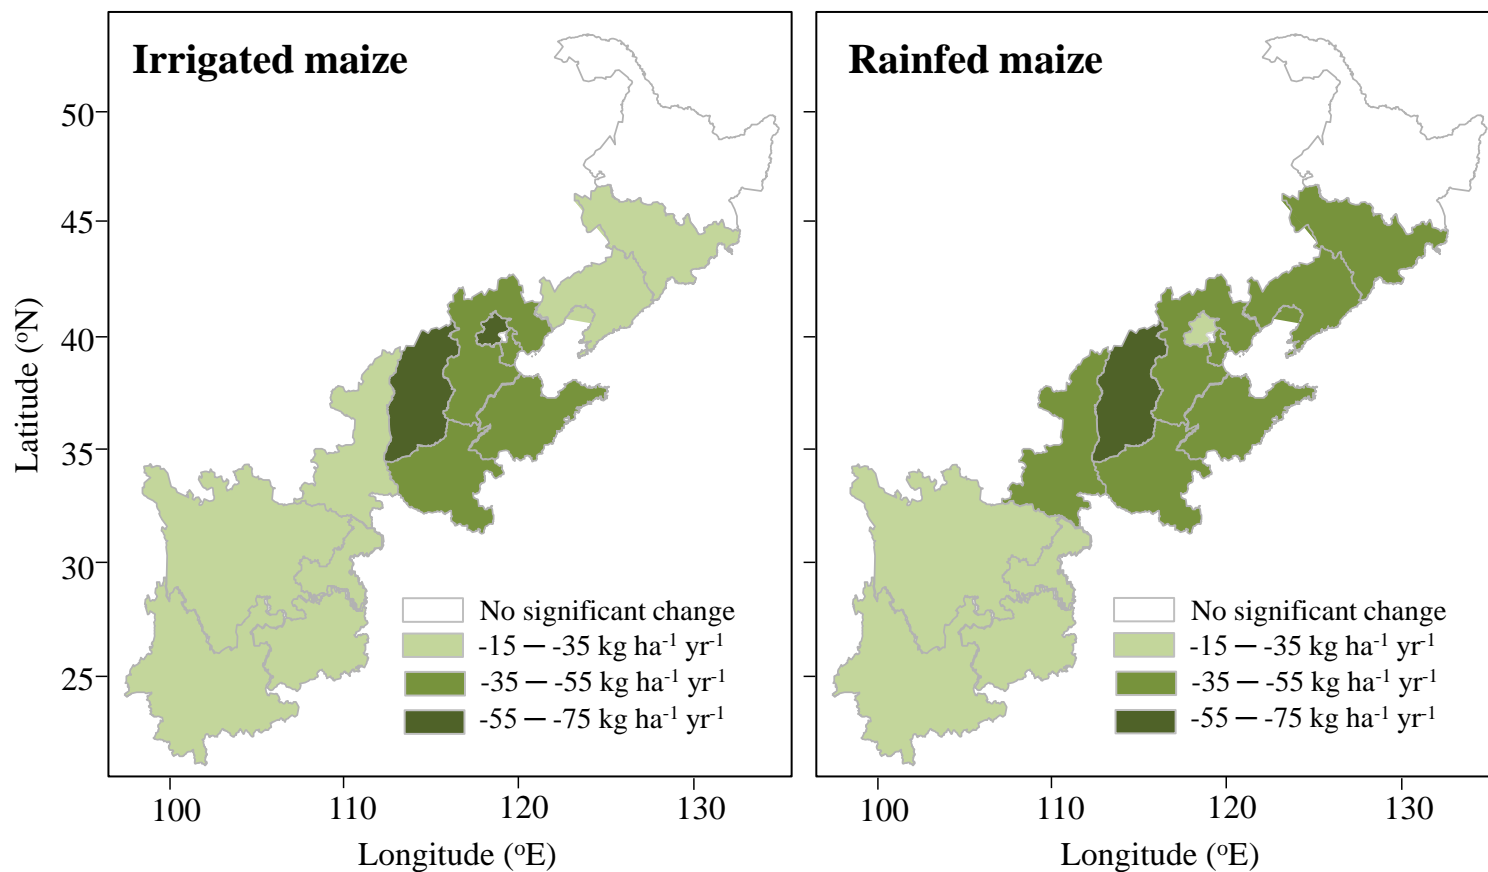

**Supplementary Figure S5. Impacts of climate trend on maize yield for irrigated and rainfed maize from 1980 to 2009 with 1980s varieties.** We firstly made the standard module with ArcGIS 10.0 for the province level and then copied to the PowerPoint 2010. Then we made the individual map. Secondly, the maps were generated in PowerPoint 2010.

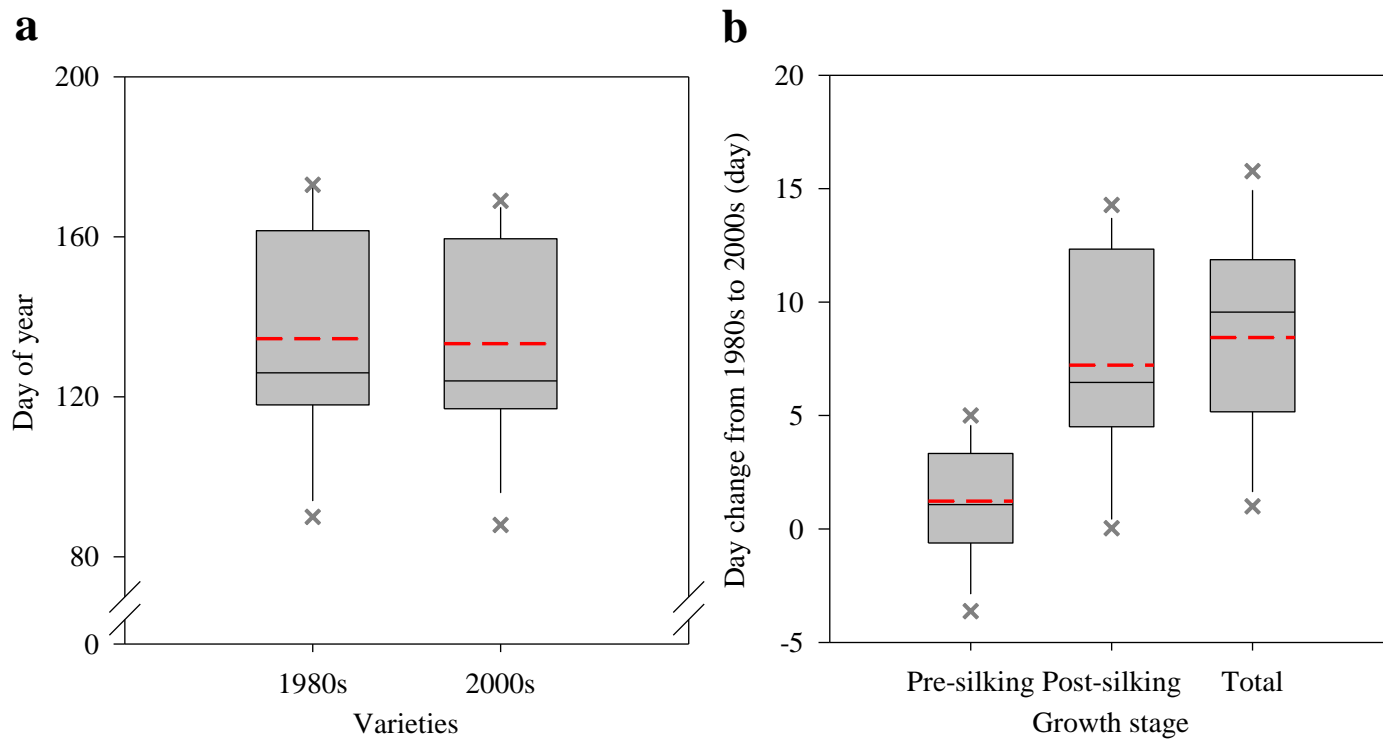

**Supplementary Figure S6. Sowing date (a) and growth stages changes (b) between 1980s and 2000s varieties in pre-, and post-silking and total for whole Chinese Maize Belt.** Solid and dashed lines indicate median and mean values, respectively. Box boundaries indicate upper and lower quartiles; the line upper and lower indicate 90th and 10th percentiles; cross indicate 95th and 5th percentiles.

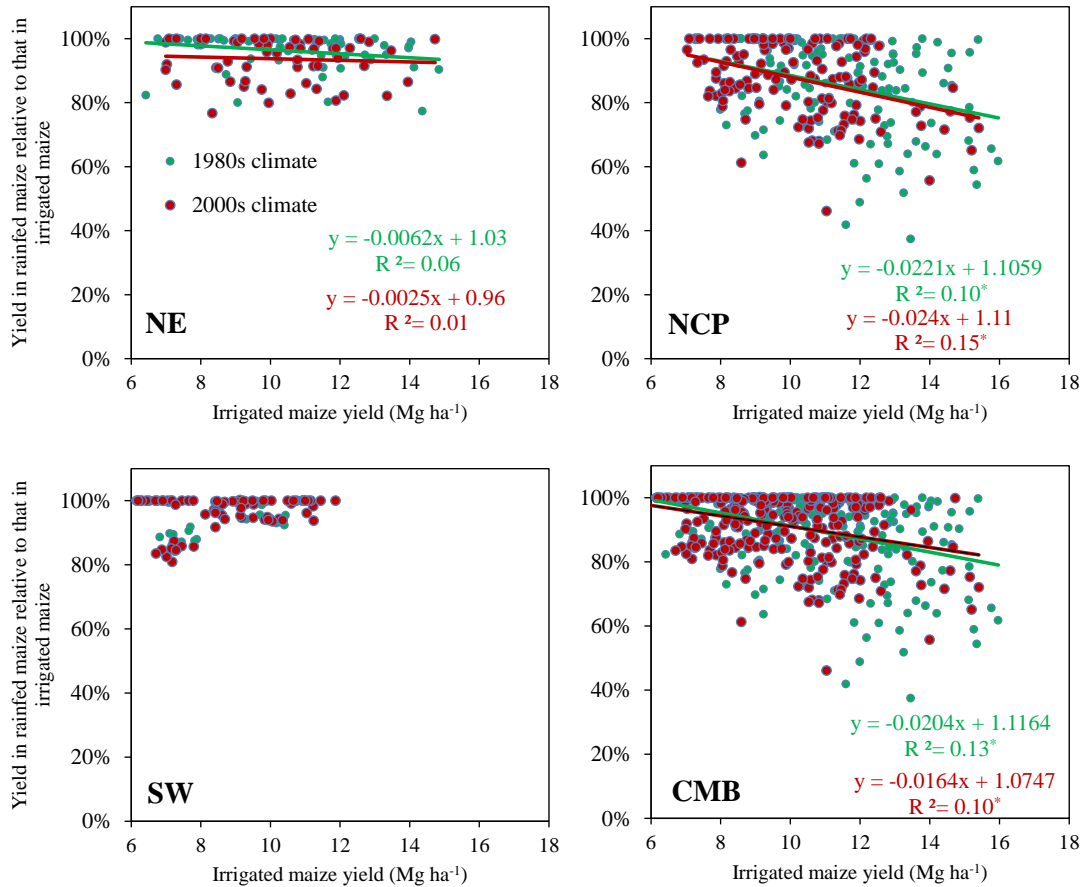

**Supplementary Figure S7. Grain yield in rainfed maize expressed as a percentage of grain yield in irrigated maize plotted against irrigated maize yield with the 1980s and the 2000s climates. NE, NCP, SW and CMB is Northeast China, North China Plain, Southwest China and Chinese Maize Belt, respectively.**



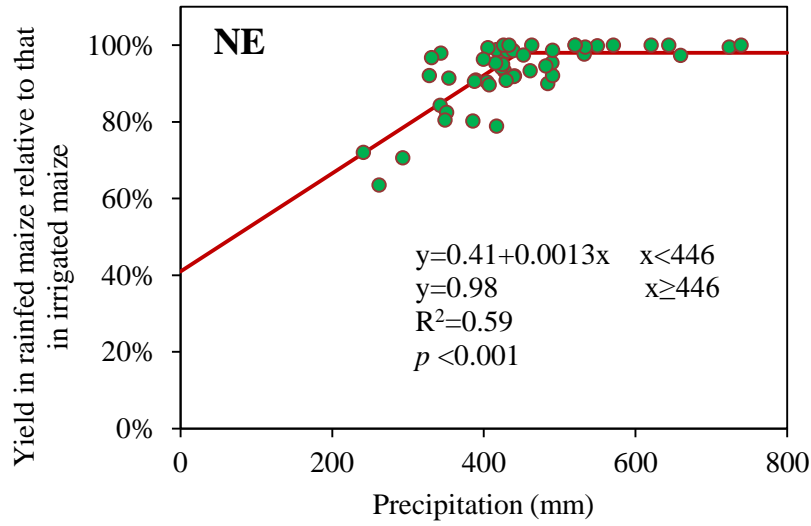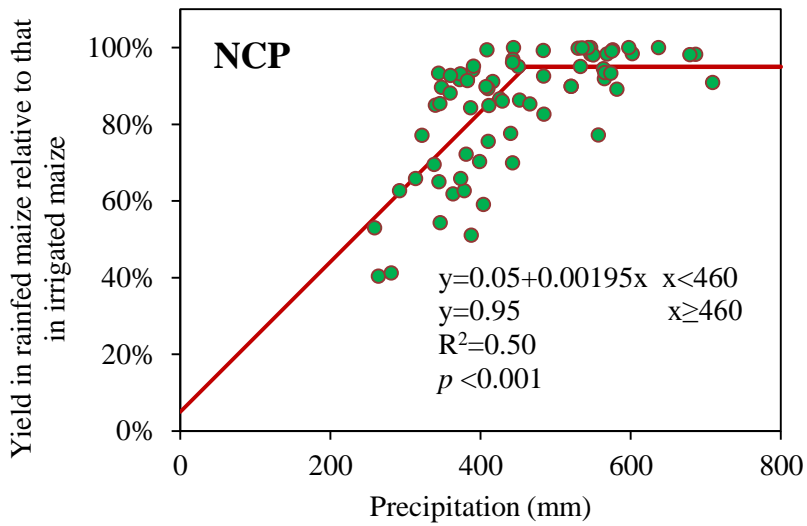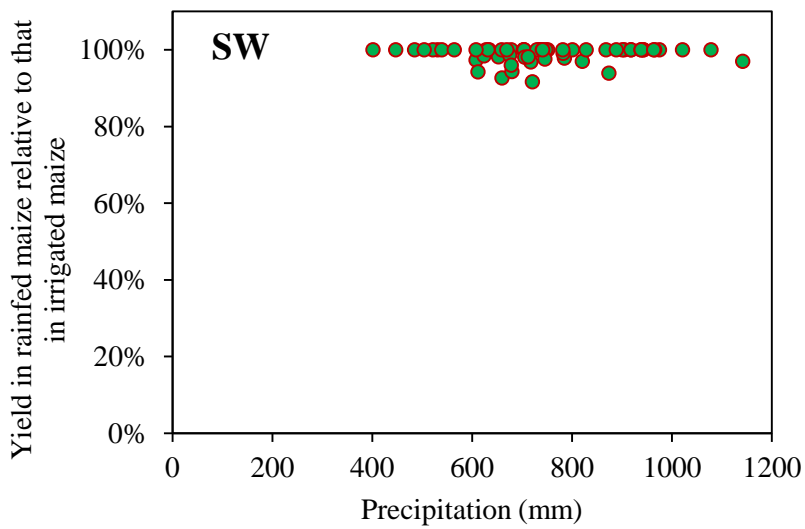

**Supplementary Figure S8. Grain yield in rainfed maize expressed as a percentage of grain yield in irrigated maize plotted against precipitation**

**during the maize growing season.** NE, NCP and SW is Northeast China, North China Plain, and Southwest China, respectively.

**Supplementary Table S1. Simulated grain yield changes for irrigated maize for different climate variables (minimum temperature, maximum temperature and solar radiation) from 1980s to 2000s with 1980s varieties.**

| Region   | Yield in 1980s<br>Mg ha <sup>-1</sup> | Yield change with varying climate variables from 1980s to 2000s |                     |                 |
|----------|---------------------------------------|-----------------------------------------------------------------|---------------------|-----------------|
|          |                                       | Minimum temperature<br>-----%-----                              | Maximum temperature | Solar radiation |
| NE China | 9.5                                   | -2                                                              | -3                  | 0               |
| NCP      | 10.0                                  | -3                                                              | -4                  | -4              |
| SW China | 8.4                                   | -1                                                              | -3                  | 0               |
| CMB      | 9.4                                   | -2                                                              | -3                  | -2              |

**Supplementary Table S2. The phenology (sowing, silking and maturity dates) information for each province for both 1980s and 2000s varieties.**

| Province              | 1980s variety |         |         | 2000s variety |         |         |
|-----------------------|---------------|---------|---------|---------------|---------|---------|
|                       | Sowing        | Silking | Harvest | Sowing        | Silking | Harvest |
| Heilongjiang          | 6-May         | 30-Jul  | 16-Sep  | 4-May         | 30-Jul  | 23-Sep  |
| Jilin                 | 29-Apr        | 27-Jul  | 15-Sep  | 30-Apr        | 28-Jul  | 21-Sep  |
| Liaoning              | 27-Apr        | 26-Jul  | 13-Sep  | 28-Apr        | 26-Jul  | 18-Sep  |
| Hebei                 | 14-Jun        | 9-Aug   | 19-Sep  | 12-Jun        | 10-Aug  | 29-Sep  |
| Henan                 | 9-Jun         | 6-Aug   | 14-Sep  | 7-Jun         | 2-Aug   | 17-Sep  |
| Shandong              | 9-Jun         | 8-Aug   | 16-Sep  | 6-Jun         | 6-Aug   | 26-Sep  |
| Beijing               | 21-Jun        | 11-Aug  | 20-Sep  | 15-Jun        | 8-Aug   | 25-Sep  |
| Tianjin               | 23-Jun        | 13-Aug  | 15-Sep  | 19-Jun        | 10-Aug  | 26-Sep  |
| Shanxi                | 30-Apr        | 17-Jul  | 15-Sep  | 26-Apr        | 17-Jul  | 27-Sep  |
| Shannxi               | 1-May         | 16-Jul  | 6-Sep   | 30-Apr        | 11-Jul  | 15-Sep  |
| Guizhou               | 10-Apr        | 27-Jun  | 10-Aug  | 18-Apr        | 6-Jul   | 24-Aug  |
| Yunnan                | 10-May        | 10-Jul  | 7-Sep   | 10-May        | 15-Jul  | 13-Sep  |
| Sichuan and Chongqing | 30-Mar        | 26-Jun  | 6-Aug   | 28-Mar        | 24-Jun  | 9-Aug   |

**Supplementary Table S3. The growing degree-days (GDD) for each Province for both 1980s and 2000s varieties.**

| Province                 | 1980s variety |              |       | 2000s variety |              |       |
|--------------------------|---------------|--------------|-------|---------------|--------------|-------|
|                          | Pre-silking   | Post-silking | Total | Pre-silking   | Post-silking | Total |
| Heilongjiang             | 710           | 430          | 1140  | 789           | 478          | 1267  |
| Jilin                    | 785           | 528          | 1314  | 887           | 577          | 1464  |
| Liaoning                 | 906           | 617          | 1523  | 983           | 694          | 1677  |
| Hebei                    | 835           | 541          | 1376  | 958           | 654          | 1611  |
| Henan                    | 968           | 567          | 1535  | 977           | 682          | 1659  |
| Shandong                 | 892           | 535          | 1427  | 931           | 696          | 1627  |
| Beijing                  | 841           | 519          | 1360  | 910           | 650          | 1560  |
| Tianjin                  | 878           | 472          | 1350  | 909           | 660          | 1569  |
| Shanxi                   | 828           | 693          | 1521  | 949           | 820          | 1768  |
| Shannxi                  | 724           | 606          | 1330  | 759           | 768          | 1527  |
| Guizhou                  | 852           | 673          | 1525  | 950           | 748          | 1698  |
| Yunnan                   | 752           | 707          | 1459  | 804           | 740          | 1544  |
| Sichuan and<br>Chongqing | 816           | 563          | 1379  | 833           | 667          | 1500  |
